# Supplementary material for: The ZEB1 pathway links glioblastoma initiation, invasion and chemoresistance
Source: PubMed Central journal article supplement (PMC3944461; doi:10.1002/emmm.201302827), 2013-07-01
Supplement: emmm0005-1196-SD1.pdf [file emmm0005-1196-SD1.pdf]

## Supplemental Information

The ZEB1 pathway links glioblastoma initiation, invasion and chemoresistance

FA Siebzehnruhl, DJ Silver, B Tugertimur, LP Deleyrolle, D Siebzehnruhl, MR Sarkisian, KG Devers, AT Yachnis, MD Kupper, D Neal, NH Nabils, MP Kladde, O Suslov, S Brabletz, T Brabletz, BA Reynolds, DA Steindler

### Table of contents:

|           |                                                  |       |
|-----------|--------------------------------------------------|-------|
| Figure S1 | EMT factors in glioblastoma                      | p. 2  |
| Figure S2 | Additional ZEB1 data; microRNA binding sites     | p. 3  |
| Figure S3 | ROBO1 mediates invasion                          | p. 4  |
| Figure S4 | c-MYB and MGMT mediate chemoresistance           | p. 5  |
| Figure S5 | MGMT promoter methylation; additional K-M curves | p. 6  |
| Figure S6 | Additional patient and TCGA data                 | p. 7  |
| Table S1  | Clinical information of patient samples          | p. 9  |
| Table S2  | Vendor information for antibodies                | p. 10 |

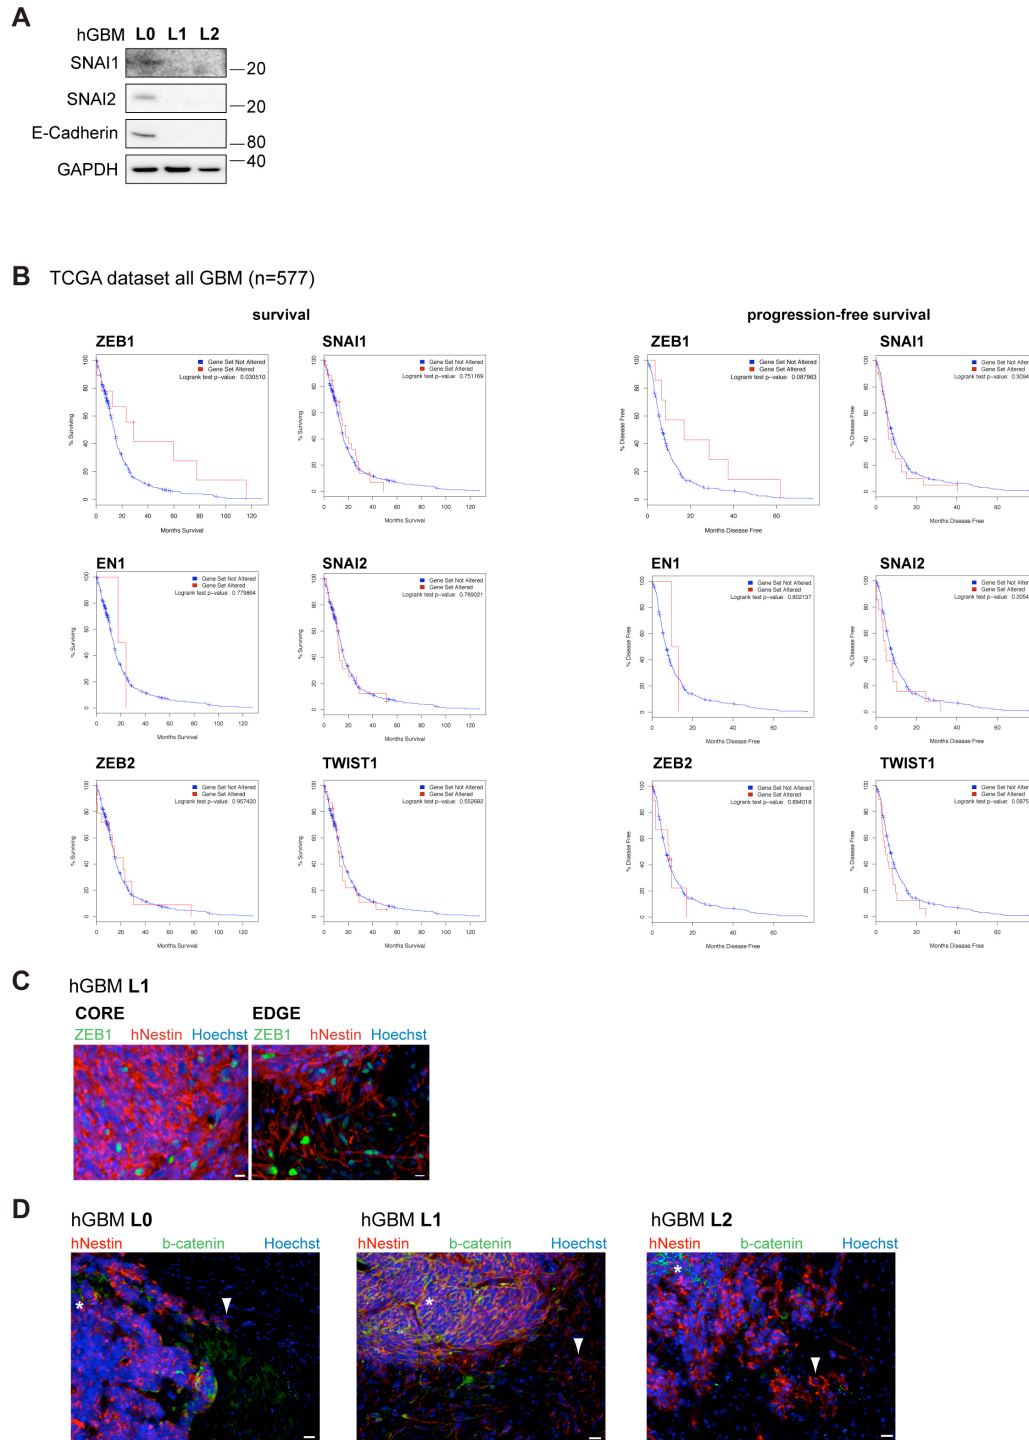

**Figure S1**

(A) SNAI1, SNAI2, and E-cadherin are expressed in hGBM L0, but not in the other two lines. (B) ZEB1 is the only EMT-associated factor analyzed that affects outcome in the TCGA dataset (REF). (C) ZEB1 is increased at the tumor edge of hGBM L1. Scale bars 10  $\mu$ m. (D) Tumor mass cells (asterisks) are characterized by membrane-associated beta-catenin, which is absent in invasive cells. Note that invasive cells show no nuclear accumulation of beta-catenin (arrowheads). Scale bars 10  $\mu$ m.

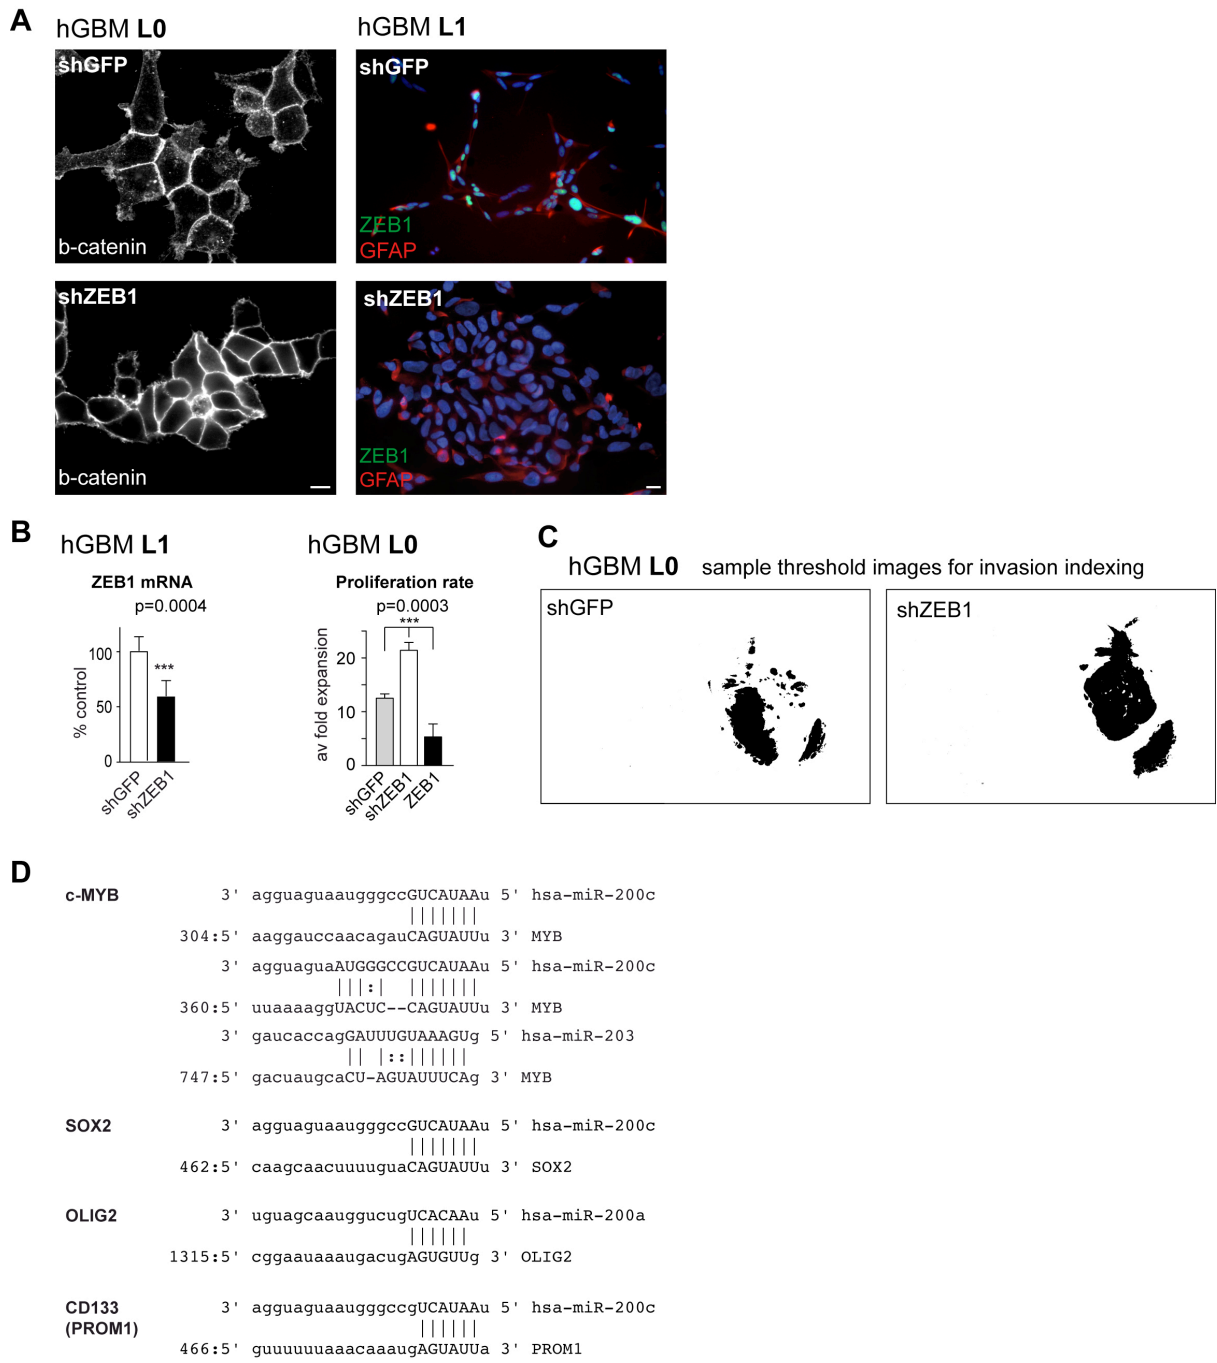

**Figure S2**

(A) Beta-catenin is associated with the cell membrane in both control cells (shGFP) and ZEB1 knockdown, while only controls are positive for ZEB1. In addition, control cells appear more dispersed after plating. Scale bars 10  $\mu$ m. (B) ZEB1 knockdown reduces ZEB1 mRNA levels in tumor-sphere cultures (representative data from hGBM L1, n=3, t-test). ZEB1 knockdown increases cellular proliferation approximately two-fold, whereas forced expression decreases proliferation rates (hGBM L0, n=3, one-way ANOVA). (C) Threshold images generated from immunofluorescence staining depicted in Figure 2B. These images are used for measuring invasion indices. (D) Putative miR-200c binding sites in the 5'-UTR of c-MYB, SOX2, OLIG2 and CD133.

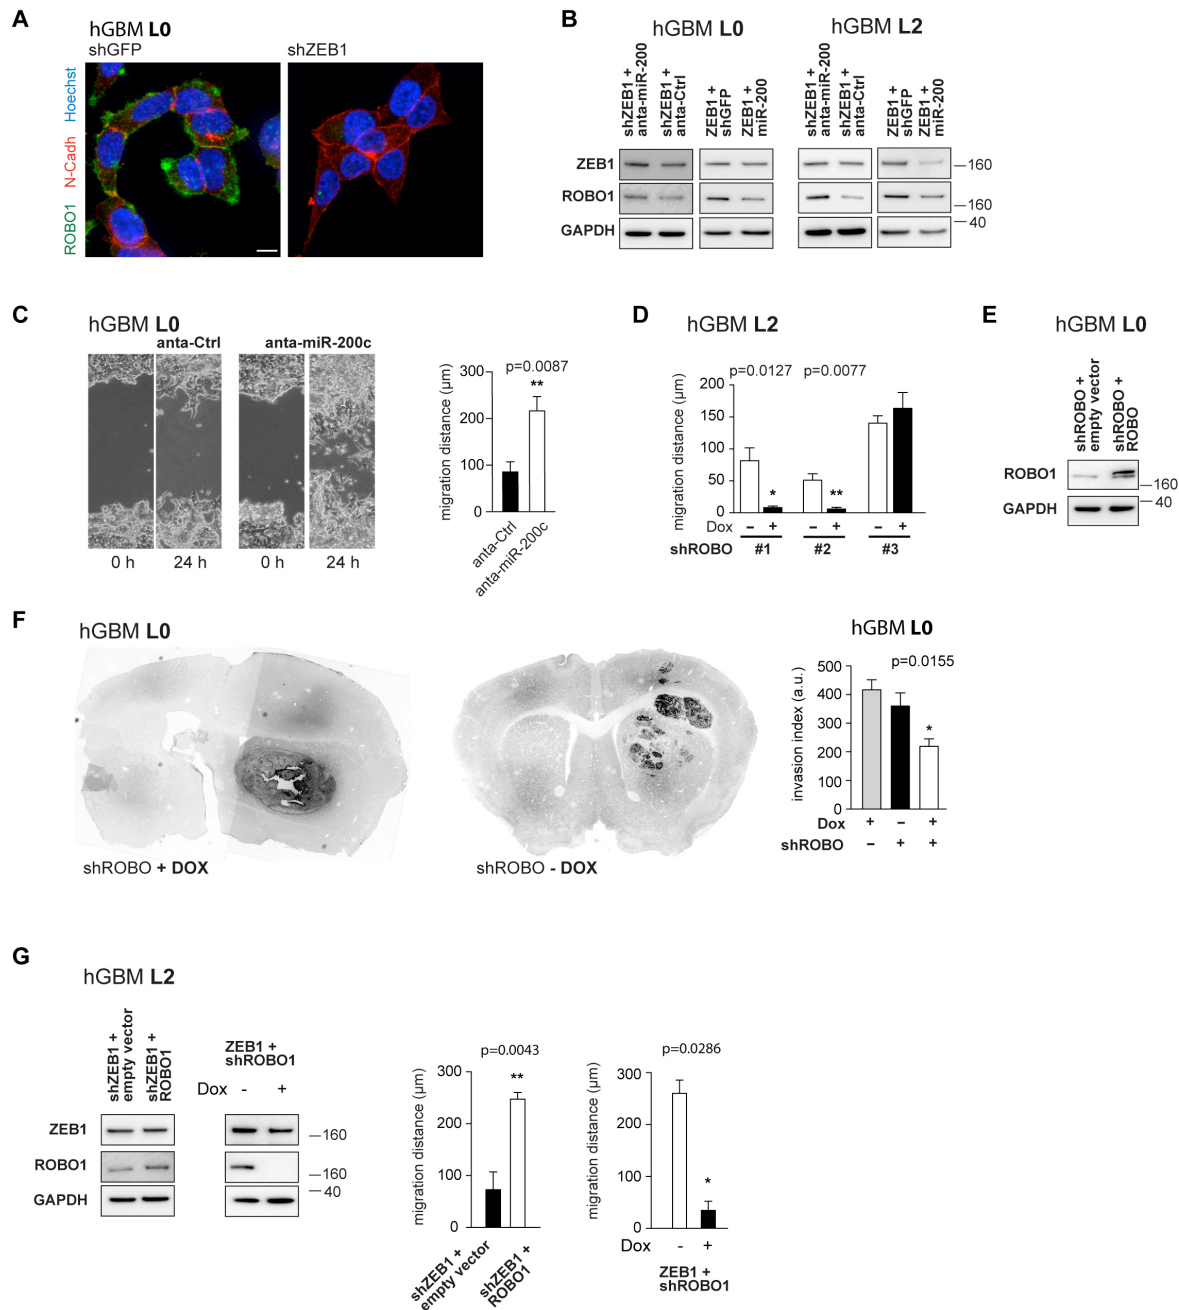

### Figure S3

(A) ROBO1 is preferentially localized at the cell membrane of control cells (shGFP), and absent in ZEB1 knockdown cells. Scale bar, 10 μm. (B) ROBO1 expression is increased by antagonizing miR-200 in ZEB1 knockdown cells, and decreased by forced expression of miR-200 in ZEB1 overexpressing cells. (C) Antagonizing miR-200 increases cell migration (n=3; Mann-Whitney U test). (D) ROBO1 knockdown reduces migration in a scratch assay (n=3, Mann-Whitney U test). (E) ROBO1 knockdown can be rescued by a non-targeted ROBO1 construct. (F) ROBO1 knockdown reduces tumor invasion *in vivo* (n=5 animals each, one-way ANOVA). (G) Forced expression of ROBO1 rescues cell migration in ZEB1 knockdown cells, while ROBO1 knockdown reduces migration in ZEB1 overexpressing cells (n=3; Mann-Whitney U test).

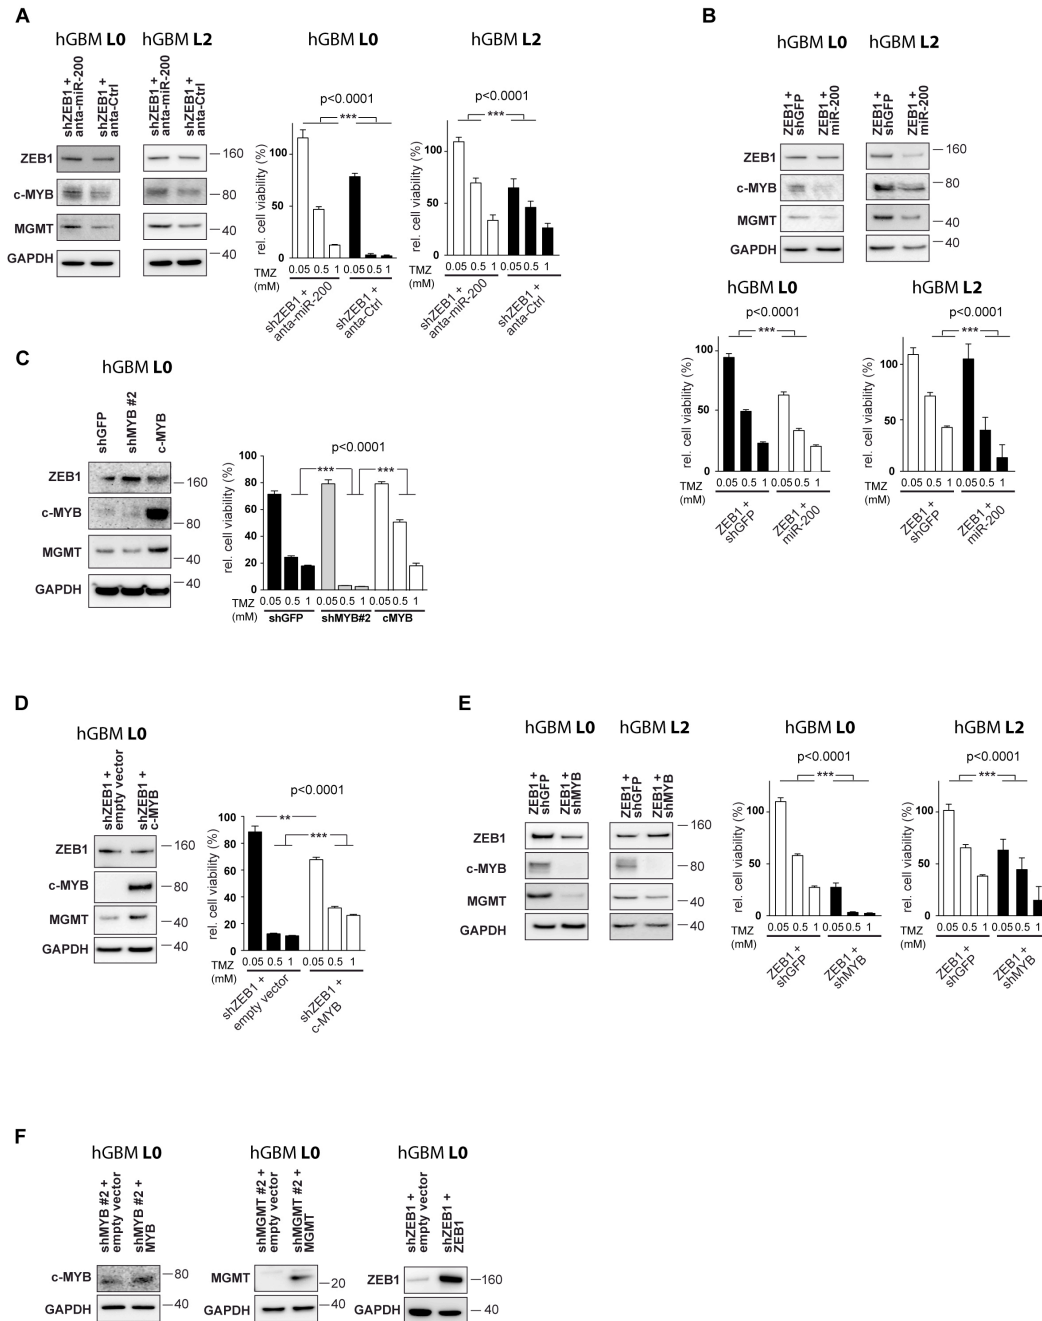

**Figure S4**

(A) Antagonizing miR-200 increases expression of c-MYB and MGMT, as well as chemoresistance in ZEB1 knockdown cells (n=8, one-way ANOVA). (B) Forced expression of miR-200 reduces expression of c-MYB and MGMT in ZEB1 overexpressing cells, and results in reduced chemoresistance (n=8, one-way ANOVA). (C) Knockdown of c-MYB reduces expression of MGMT, while overexpression of c-MYB increases MGMT levels. Both have no influence on ZEB1 expression. Resistance to TMZ is significantly reduced by c-MYB knockdown *in vitro* (n=8, one-way ANOVA). (D) Chemoresistance in ZEB1-knockdown cells can be rescued by expression of c-MYB (n=8, one-way ANOVA). (E) Knockdown of c-MYB reduces expression of MGMT and chemoresistance in ZEB1-overexpressing cells. (F) Rescue of MYB, MGMT and ZEB1 knockdown with respective untargeted constructs.

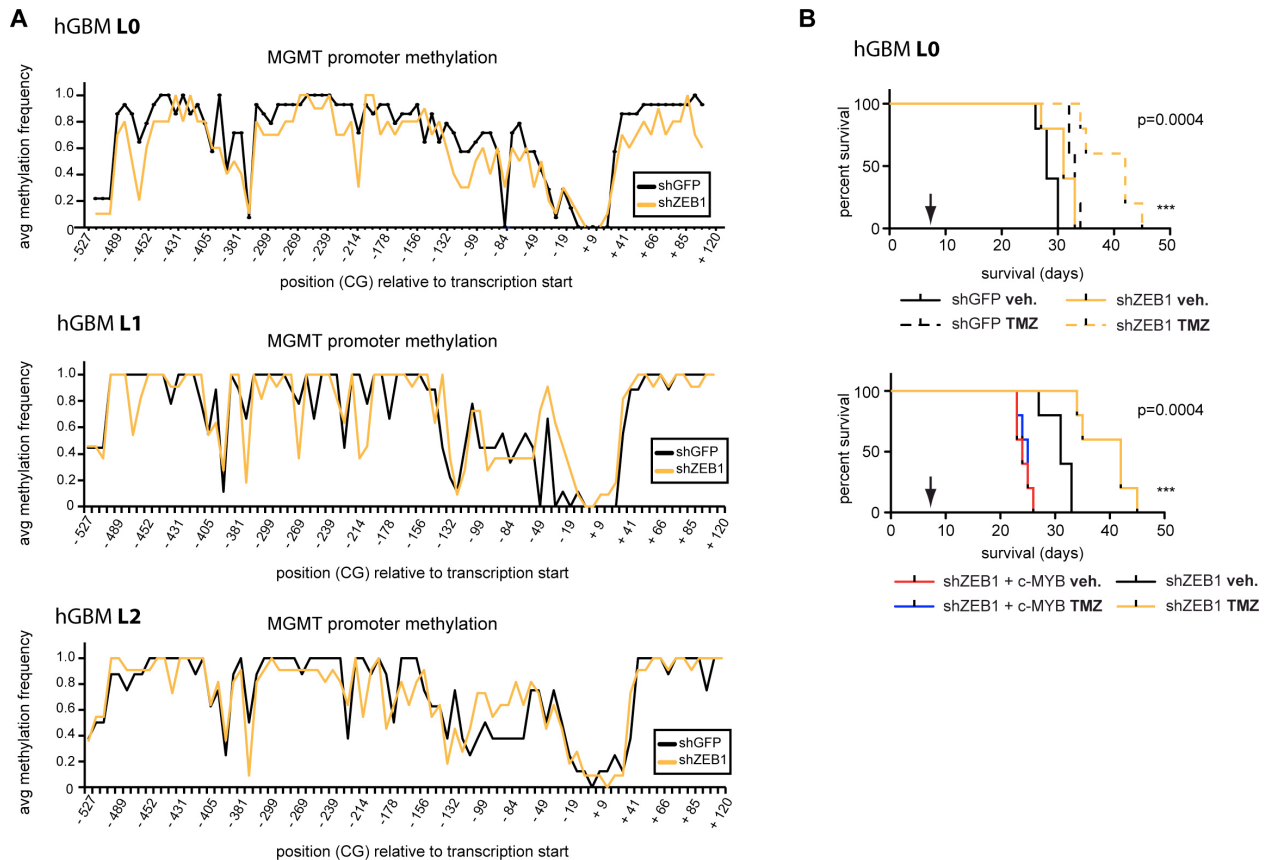

### Figure S5

(A) Bisulfite genomic sequencing of the *MGMT* promoter demonstrates no significant methylation changes in ZEB1 knockdown cells. The *MGMT* promoter was amplified from -555 to +120 relative to the TSS. The frequency of methylation at each CG site was calculated from at least 10 cloned and sequenced molecules for each condition. Data is presented as the average methylation frequency and the position of each CG site relative to the TSS is indicated. (B) ZEB1 knockdown increases survival of tumor-bearing animals after one cycle (5 injections) of TMZ treatment *in vivo* (log-rank test). Expression of c-MYB in ZEB1 knockdown cells abolished this survival benefit (log-rank test).

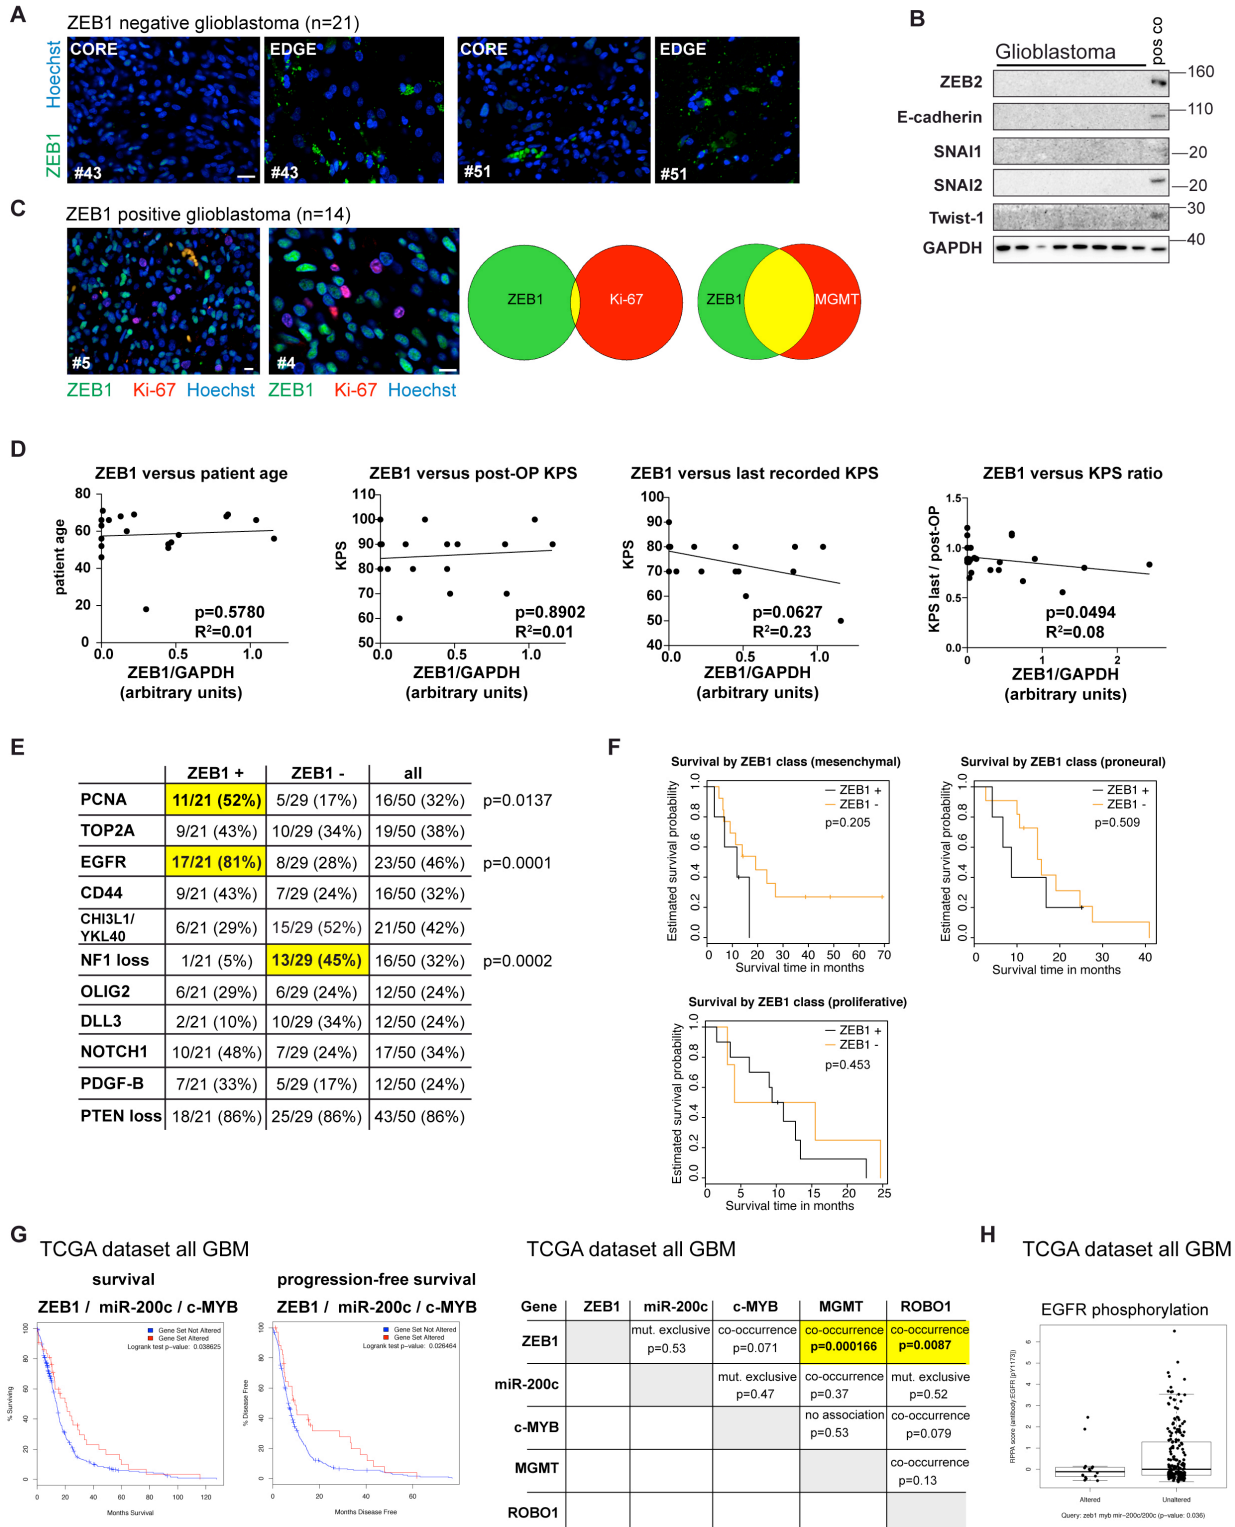

**Figure S6**

(A) ZEB1 negative glioblastoma specimens do not stain for ZEB1 at the tumor invasion front. Scale bar 20  $\mu$ m (applies to all images). (B) ZEB1, E-cadherin, SNAI1, SNAI2, and Twist-1 are not expressed in glioblastoma specimens. (C) ZEB1 and the proliferation marker Ki-67 are mutually exclusive in tumor specimens ( $3.66 \pm 0.21$  % co-localization; n=14; Venn diagrams illustrate

overlapping populations of ZEB1 and Ki-67, and ZEB1 and MGMT, respectively). (D) Neither age, nor KPS scores (post-OP or last recorded) correlate with ZEB1, but a significant correlation was found for the ratio of last recorded to post-OP KPS score. (E) PCNA and EGFR are significantly enriched in ZEB1 positive tumor specimens, while loss of NF1 is significantly more frequent in ZEB1 negative samples (Fisher's exact test). (F) Survival analysis for ZEB1 class by molecular subgroups revealed no significant outcome benefit in either subgroup, but shows a general trend for improved outcome in ZEB1 negative tumors. Note the shorter overall survival in the proliferative subgroup (which has the highest percentage of ZEB1+ specimens). (G) TCGA analysis of the ZEB1/miR-200c/c-MYB pathway shows significant changes in patient outcome. Both MGMT and ROBO1 frequently co-occur with ZEB1 in TCGA samples (p-values are from Fisher's exact test). (H) ZEB1 positive samples show higher levels of p-EGFR in RPPA.



**Table S1: Clinical information of patient samples used in this study.**

| Patient # | age (yr) | sex | diagnosis    | survival (m) | TMZ | TMZ duration (m) | TMZ response | ZEB1 | IDH1 | PDGF-B | Notch1 | Olig2 | DLL3 | PTEN | PCNA | TOP2A | EGFR | NF1 | CD44 | CHI3L1 | subclass |
|-----------|----------|-----|--------------|--------------|-----|------------------|--------------|------|------|--------|--------|-------|------|------|------|-------|------|-----|------|--------|----------|
| 1         | 69       | M   | glioblastoma | 8.7          | un  | na               | na           | +    | -    | -      | +      | +     | -    | -    | -    | -     | +    | +   | -    | -      | PN       |
| 4         | 56       | M   | glioblastoma | 2.9          | un  | na               | na           | +    | -    | -      | +      | +     | -    | -    | +    | -     | +    | +   | +    | +      | MES      |
| 5         | 68       | M   | glioblastoma | 13.4         | y   | 4                | progression  | +    | -    | -      | -      | -     | -    | -    | +    | -     | +    | +   | +    | -      | PROL     |
| 6         | 78       | M   | glioblastoma | 6.2          | un  | na               | na           | +    | -    | -      | -      | -     | -    | -    | -    | +     | +    | +   | +    | -      | PROL     |
| 7         | 66       | F   | glioblastoma | 16.8         | n   | na               | progression  | +    | -    | +      | +      | +     | -    | -    | +    | -     | +    | +   | -    | -      | PN       |
| 8         | 78       | M   | glioblastoma | 11           | un  | na               | na           | +    | -    | -      | +      | -     | -    | -    | +    | +     | +    | +   | +    | +      | PROL     |
| 14        | 43       | M   | glioblastoma | 9            | y   | 2                | progression  | +    | -    | -      | -      | -     | -    | -    | -    | -     | +    | -   | -    | -      | PROL     |
| 15        | 74       | F   | glioblastoma | 22.7         | y   | un               | progression  | +    | -    | -      | +      | -     | -    | -    | +    | -     | +    | +   | -    | -      | PROL     |
| 20        | 56       | F   | glioblastoma | 11.8         | y   | 3.25             | progression  | +    | -    | -      | +      | -     | -    | -    | -    | +     | +    | +   | +    | +      | MES      |
| 22        | 69       | M   | glioblastoma | 9.4          | y   | 3.5              | progression  | +    | -    | +      | -      | -     | -    | +    | -    | +     | +    | +   | -    | -      | PROL     |
| 25        | 64       | M   | glioblastoma | 6.9          | y   | 0.25             | progression  | +    | -    | -      | -      | -     | -    | -    | -    | -     | -    | -   | +    | +      | MES      |
| 31        | 69       | M   | glioblastoma | 1.6          | n   | na               | na           | +    | un   | +      | -      | -     | -    | -    | -    | +     | +    | +   | -    | -      | PROL     |
| 32        | 58       | M   | glioblastoma | 25.1         | y   | 4                | progression  | +    | un   | -      | +      | +     | -    | -    | -    | -     | -    | +   | -    | -      | PN       |
| 35        | 18       | M   | glioblastoma | 3.5          | y   | 0.25             | progression  | +    | un   | +      | -      | -     | -    | -    | +    | +     | -    | +   | -    | -      | PROL     |
| 38        | 50       | F   | glioblastoma | 12.5         | y   | 1                | stable       | +    | un   | -      | -      | -     | -    | -    | -    | +     | +    | +   | +    | +      | MES      |
| 40        | 58       | F   | glioblastoma | 10.2         | y   | 1.5              | un           | +    | -    | -      | -      | -     | -    | -    | +    | -     | +    | +   | -    | -      | PROL     |
| 41        | 67       | F   | glioblastoma | 4.2          | y   | un               | un           | +    | -    | +      | -      | +     | +    | -    | -    | -     | -    | +   | -    | -      | PN       |
| 46        | 64       | M   | glioblastoma | 12.7         | un  | na               | na           | +    | -    | -      | -      | -     | -    | -    | +    | +     | +    | +   | -    | -      | PROL     |
| 47        | 74       | M   | glioblastoma | 9.9          | un  | na               | na           | +    | -    | +      | +      | +     | -    | -    | +    | +     | +    | +   | -    | -      | PROL     |
| 50        | 75       | M   | glioblastoma | 16.7         | y   | 1.5              | un           | +    | -    | -      | -      | -     | -    | -    | +    | -     | +    | +   | +    | +      | MES      |
| 55        | 76       | F   | glioblastoma | 6.7          | y   | un               | un           | +    | un   | +      | +      | -     | +    | -    | -    | -     | +    | +   | +    | -      | PN       |
| hGBM L0   | 43       | M   | glioblastoma | un           | un  | un               | un           | +    | un   | -      | +      | -     | -    | -    | +    | +     | +    | +   | -    | -      | PROL     |
| hGBM L1   | 45       | F   | glioblastoma | un           | un  | un               | un           | +    | un   | -      | +      | +     | -    | -    | +    | +     | +    | +   | +    | -      | PROL     |
| hGBM L2   | 30       | F   | glioblastoma | un           | un  | un               | un           | +    | un   | -      | +      | -     | -    | -    | +    | -     | +    | -   | -    | -      | PROL     |

|    |    |   |              |      |    |       |             |   |    |   |   |   |   |   |   |   |   |   |   |   |      |
|----|----|---|--------------|------|----|-------|-------------|---|----|---|---|---|---|---|---|---|---|---|---|---|------|
| 2  | 52 | F | glioblastoma | 44.9 | y  | 10.25 | improved    | - | -  | + | - | - | - | - | - | - | - | + | - | + | MES  |
| 3  | 56 | M | glioblastoma | 27   | y  | 7.75  | stable      | - | -  | - | - | - | - | - | - | - | - | - | - | + | MES  |
| 10 | 51 | M | glioblastoma | 40.9 | y  | 25.75 | progression | - | -  | - | + | + | - | - | + | - | - | - | - | + | PN   |
| 11 | 46 | M | glioblastoma | 48.6 | y  | 26    | stable      | - | +  | - | - | + | - | - | - | - | - | - | - | + | MES  |
| 12 | 53 | M | glioblastoma | 24.7 | y  | 16    | progression | - | -  | - | - | - | - | - | + | - | + | + | - | - | PROL |
| 13 | 66 | M | glioblastoma | 19.2 | y  | 7     | progression | - | un | + | - | - | - | - | + | - | - | + | + | + | MES  |
| 16 | 70 | F | glioblastoma | 69.1 | y  | un    | stable      | - | -  | - | + | - | - | - | - | - | - | + | + | + | MES  |
| 17 | 56 | F | glioblastoma | 6.3  | y  | 3.75  | recurrence  | - | -  | - | - | - | - | - | - | - | - | + | - | + | MES  |
| 18 | 63 | M | glioblastoma | 10.6 | y  | 1.5   | progression | - | un | + | + | - | - | - | - | + | - | + | - | - | PN   |
| 19 | 65 | M | glioblastoma | 13.9 | y  | un    | un          | - | -  | - | - | + | - | - | - | - | + | + | - | + | MES  |
| 21 | 49 | M | glioblastoma | 14.8 | y  | 4.5   | progression | - | un | - | - | + | + | - | - | - | - | - | + | - | PN   |
| 23 | 69 | M | glioblastoma | 15.7 | y  | 8     | stable      | - | -  | + | - | + | - | - | - | - | + | + | - | - | PN   |
| 24 | 71 | M | glioblastoma | 38.9 | y  | 10.5  | progression | - | un | - | - | - | - | - | - | + | - | - | - | + | MES  |
| 26 | 60 | M | glioblastoma | 19.1 | y  | 10.5  | progression | - | -  | - | + | + | - | - | - | - | - | + | - | - | PN   |
| 27 | 20 | F | glioblastoma | 23.6 | y  | 2     | progression | - | -  | - | - | - | + | - | - | + | - | - | + | - | MES  |
| 29 | 66 | F | glioblastoma | 10   | y  | 1.5   | progression | - | +  | - | - | + | - | - | - | - | - | + | - | - | PN   |
| 30 | 61 | M | glioblastoma | 4.1  | n  | na    | na          | - | un | - | - | - | - | - | - | + | + | + | - | - | PROL |
| 33 | 68 | F | glioblastoma | 2.7  | y  | 1.4   | progression | - | -  | - | + | - | - | + | - | + | - | - | - | - | PN   |
| 37 | 66 | F | glioblastoma | 14.2 | y  | 1.25  | un          | - | un | - | - | - | - | - | - | - | - | - | - | - | MES  |
| 39 | 60 | M | glioblastoma | 11.6 | y  | 1.75  | un          | - | -  | - | + | - | - | - | - | - | - | + | - | - | PN   |
| 42 | 38 | M | glioblastoma | 15.5 | y  | 3.5   | progression | - | un | + | - | - | - | - | - | + | + | + | + | - | PROL |
| 43 | 76 | M | glioblastoma | 6.6  | y  | 2     | progression | - | -  | - | - | - | - | - | + | - | + | - | - | + | MES  |
| 48 | 62 | M | glioblastoma | 11.3 | na | na    | na          | - | -  | - | + | + | - | - | + | + | + | - | + | + | MES  |
| 49 | 58 | M | glioblastoma | 27.6 | na | na    | na          | - | -  | - | - | + | + | + | - | + | - | + | - | - | PN   |
| 51 | 56 | M | glioblastoma | 24.7 | y  | 12    | progression | - | -  | - | - | - | + | + | - | + | - | - | - | + | PN   |
| 52 | 75 | M | glioblastoma | 14.8 | n  | na    | na          | - | -  | - | - | + | + | + | - | - | - | - | - | - | PN   |
| 53 | 74 | M | glioblastoma | 3.1  | n  | na    | na          | - | -  | - | - | - | - | - | + | - | - | + | - | - | PROL |
| 54 | 73 | F | glioblastoma | 9.1  | y  | 2     | stable      | - | -  | - | - | - | - | - | - | - | - | - | - | + | MES  |
| 57 | 58 | M | glioblastoma | 4.7  | un | na    | na          | - | un | - | - | - | - | - | - | - | - | + | + | + | MES  |

**Key**  
un unknown  
na not applicable  
+ protein present  
- protein absent  
PN proneural  
MES mesenchymal  
PROL proliferative

Samples were stratified into a particular molecular subclass according to expression of most markers for this subclass.  
Samples positive for more than one class were assigned to the subclass in which they showed the highest expression profile.

**Table S2:** Vendor information for antibodies used in this study.

## Primary antibodies

| Antigen               | Species | Dilution | Vendor         | Catalog #   |
|-----------------------|---------|----------|----------------|-------------|
| beta-catenin          | rabbit  | 1:200    | Sigma          | C2206       |
| beta-catenin          | mouse   | 1:200    | Cell Signaling | 2677        |
| CD44                  | rabbit  | 1:1,000  | Cell Signaling | 3578        |
| CD133                 | mouse   | 1:100    | Miltenyi       | 130-092-395 |
| CHI3L1/YKL40          | goat    | 1:100    | r&d systems    | AF2599      |
| DLL3                  | rabbit  | 1:1,000  | Sigma          | SAB2100594  |
| E-cadherin            | mouse   | 1:1,000  | Invitrogen     | 180223      |
| EGFR                  | rabbit  | 1:10,000 | Epitomics      | 1902-1      |
| EN-1                  | rabbit  | 1:1,000  | Millipore      | AB5732      |
| GAPDH                 | mouse   | 1:10,000 | *              |             |
| GFAP                  | mouse   | 1:500    | Sigma          | G6171       |
| IDH1 <sup>R132H</sup> | mouse   | 1:20     | Dianova        | DIA-H09     |
| Ki-67                 | mouse   | 1:100    | Dako           | M7240       |
| MGMT                  | mouse   | 1:500    | Invitrogen     | 35-7000     |
| MYB                   | rabbit  | 1:10,000 | Epitomics      | 1792-1      |
| N-cadherin            | rabbit  | 1:100#   | Millipore      | 04-1126     |
| N-cadherin - PE       | mouse   | 1:20     | BD             | 561554      |
| human Nestin          | mouse   | 1:1,000  | Millipore      | MAB5326     |
| NF1                   | rabbit  | 1:100    | Santa Cruz     | sc-67       |
| NOTCH1                | rabbit  | 1:1,000  | Cell Signaling | 3608        |
| OLIG2                 | rabbit  | 1:5,000  | Millipore      | AB9610      |
| PCNA                  | mouse   | 1:2,000  | Cell Signaling | 2586        |
| PDGF-B                | rabbit  | 1:500    | Santa Cruz     | sc-7878     |
| PTEN                  | rabbit  | 1:1,000  | Epitomics      | 1539-1      |
| ROBO1                 | rabbit  | 1:1,000  | Invitrogen     | 40-5900     |
| ROBO1                 | sheep   | 1:20     | r&d systems    | AF7118      |
| SNAI1                 | rabbit  | 1:1,000  | Cell Signaling | 3879        |
| SNAI2                 | rabbit  | 1:1,000  | Cell Signaling | 9585        |
| SOX2                  | rabbit  | 1:1,000  | Cell Signaling | 3579        |
| TOP2A                 | rabbit  | 1:1,000  | Cell Signaling | 4733        |
| TWIST1                | rabbit  | 1:1,000  | Millipore      | ABD29       |
| ZEB1                  | rabbit  | 1:3,000§ | Sigma          | HPA027524   |
| ZEB2                  | rabbit  | 1:3,000  | Sigma          | HPA003456   |

\*Kind gift of Dr. G. Shaw, EnCor Biosciences, Gainesville, FL

# Western blot: 1:50,000

§ Immunofluorescence 1:1,000

Secondary antibodies

| <b>Antibody</b>    | <b>Reporter</b> | <b>Dilution</b> | <b>Vendor</b>                 | <b>Catalog #</b> |
|--------------------|-----------------|-----------------|-------------------------------|------------------|
| donkey anti mouse  | Alexa 555       | 1:500           | Invitrogen                    | A31570           |
| donkey anti rabbit | Alexa 488       | 1:500           | Invitrogen                    | A21206           |
| donkey anti-sheep  | Alexa 568       | 1:500           | Invitrogen                    | A21099           |
| goat anti mouse    | HRP             | 1:10,000        | Bio-Rad                       | 170-6516         |
| goat anti rabbit   | HRP             | 1:10,000        | Bio-Rad                       | 170-6515q        |
| donkey anti goat   | HRP             | 1:10,000        | Jackson<br>Immuno<br>Research | 705-035-147      |
